# Supplementary material for: Quantitative measurement of odor detection thresholds using an air dilution olfactometer, and association with genetic variants in a sample of diverse ancestry
Source: PeerJ. 2014 Nov 6;2:e643. doi: 10.7717/peerj.643 (PMC4226646; doi:10.7717/peerj.643)
Supplement: Supplemental Information 1 [file peerj-02-643-s001.xlsx]

## Sheet: Phenotype Stat Data
SubjectID	Age	Sex	Ancestry	AvgScentroidPPB
2794	18	Female	East Asian	9.2564
2810	18	Female	East Asian	14.6951
2863	18	Female	East Asian	13.8793
2912	18	Female	East Asian	56.6038
2928	18	Female	East Asian	15.6128
2803	18	Male	East Asian	27.7393
2773	19	Female	East Asian	22.7015
2781	19	Female	East Asian	5.55556
2790	19	Female	East Asian	9.2564
2866	19	Female	East Asian	9.2564
2890	19	Female	East Asian	46.5116
2904	19	Female	East Asian	19.2123
2910	19	Female	East Asian	13.8793
2937	19	Female	East Asian	16.6528
2953	19	Female	East Asian	34.2661
2954	19	Female	East Asian	17.8412
2892	19	Male	East Asian	33.8792
2791	20	Female	East Asian	17.8412
2799	20	Female	East Asian	9.6123
2807	20	Female	East Asian	19.2123
2821	20	Female	East Asian	13.8793
2850	20	Female	East Asian	16.6528
2852	20	Female	East Asian	33.3333
2853	20	Female	East Asian	64.8649
2894	20	Female	East Asian	18.5071
2909	20	Female	East Asian	40.5405
2920	20	Female	East Asian	25.9516
2936	20	Female	East Asian	14.6951
2940	20	Female	East Asian	17.8412
2946	20	Female	East Asian	17.8412
2902	20	Male	East Asian	70.5882
2947	20	Male	East Asian	26.8938
2955	20	Male	East Asian	17.8412
2770	21	Female	East Asian	15.6128
2789	21	Female	East Asian	15.6128
2908	21	Female	East Asian	16.6528
2926	21	Female	East Asian	15.6128
2929	21	Female	East Asian	9.6123
2932	21	Female	East Asian	22.7015
2938	21	Female	East Asian	19.9867
2841	21	Male	East Asian	29.383
2941	21	Male	East Asian	61.8557
2948	21	Male	East Asian	67.7966
2950	21	Male	East Asian	42.4028
2951	21	Male	East Asian	13.8793
2957	21	Male	East Asian	13.8793
2927	22	Female	East Asian	27.7393
2933	22	Female	East Asian	38.3387
2934	22	Female	East Asian	9.6123
2935	22	Female	East Asian	10.4131
2952	22	Female	East Asian	15.6128
2868	22	Male	East Asian	52.6316
2943	22	Male	East Asian	6.94364
2801	23	Female	East Asian	31.7125
2956	23	Male	East Asian	9.2564
2925	24	Female	East Asian	42.4028
2944	24	Female	East Asian	5.55556
2916	29	Female	East Asian	19.9867
2778	30	Female	East Asian	37.7358
2917	30	Male	East Asian	15.6128
2795	18	Female	European	22.4131
2834	18	Female	European	14.6951
2882	18	Female	European	34.9854
2884	18	Female	European	13.8793
2896	18	Female	European	13.8793
2913	18	Female	European	32.6797
2833	18	Male	European	19.2123
2839	18	Male	European	33.8792
2703	19	Female	European	9.2564
2771	19	Female	European	43.7637
2800	19	Female	European	13.8793
2820	19	Female	European	11.1091
2832	19	Female	European	17.6626
2838	19	Female	European	9.2564
2847	19	Female	European	6.94364
2848	19	Female	European	19.2123
2858	19	Female	European	7.14201
2870	19	Female	European	15.6128
2895	19	Female	European	14.6951
2818	19	Male	European	15.6128
2859	19	Male	European	9.2564
2854	20	Female	European	29.383
2899	20	Female	European	19.2123
2924	20	Female	European	7.14201
2842	20	Male	European	17.2315
2897	20	Male	European	14.6951
2792	21	Female	European	7.14201
2793	21	Female	European	32.6797
2808	21	Female	European	11.4264
2819	21	Female	European	9.6123
2830	21	Female	European	23.7906
2855	21	Female	European	16.6528
2878	21	Female	European	17.8412
2844	21	Male	European	33.3333
2861	21	Male	European	53.0973
2883	21	Male	European	16.6528
2903	21	Male	European	23.7906
2919	21	Male	European	22.7015
2782	22	Female	European	19.2123
2809	22	Female	European	40
2846	22	Female	European	6.94364
2877	22	Female	European	13.8793
2774	22	Male	European	13.8793
2886	22	Male	European	57.1429
2817	23	Female	European	9.2564
2872	23	Female	European	37.831
2779	23	Male	European	10.8656
2811	23	Male	European	15.6128
2813	24	Female	European	52.6316
2826	25	Male	European	15.6128
2824	26	Female	European	15.6128
2862	26	Female	European	13.8793
2845	26	Male	European	44.2804
1158	29	Female	European	5.55556
2921	30	Male	European	39.8671
2797	18	Female	South Asian	19.2123
2798	18	Female	South Asian	14.6951
2802	18	Female	South Asian	6.94364
2804	18	Female	South Asian	35.0672
2815	18	Female	South Asian	18.5071
2836	18	Female	South Asian	40.5405
2857	18	Female	South Asian	15.6128
2888	18	Female	South Asian	33.3333
2901	18	Female	South Asian	19.2123
2905	18	Female	South Asian	13.8793
2906	18	Female	South Asian	15.6128
2911	18	Female	South Asian	9.2564
2914	18	Female	South Asian	15.6128
2918	18	Female	South Asian	19.0054
2949	18	Female	South Asian	17.8412
2776	18	Male	South Asian	6.94364
2805	18	Male	South Asian	23.7906
2806	18	Male	South Asian	23.7906
2823	18	Male	South Asian	5.55556
2775	19	Female	South Asian	6.94364
2780	19	Female	South Asian	20.8117
2822	19	Female	South Asian	33.8792
2825	19	Female	South Asian	14.6951
2837	19	Female	South Asian	32.6797
2885	19	Female	South Asian	44.4444
2887	19	Female	South Asian	23.7906
2891	19	Female	South Asian	14.6951
2915	19	Female	South Asian	22.7015
2939	19	Female	South Asian	47.4308
2840	19	Male	South Asian	19.9867
2865	19	Male	South Asian	9.6123
2893	19	Male	South Asian	9.2564
2900	19	Male	South Asian	35.5872
2922	19	Male	South Asian	15.14
2814	20	Female	South Asian	16.6528
2831	20	Female	South Asian	14.6951
2849	20	Female	South Asian	6.94364
2851	20	Female	South Asian	31.2337
2867	20	Female	South Asian	41.6667
2889	20	Female	South Asian	34.9854
2923	20	Female	South Asian	13.8793
2930	20	Female	South Asian	9.2564
2931	20	Female	South Asian	48.1928
2769	21	Female	South Asian	14.6951
2829	21	Female	South Asian	41.6667
2873	21	Female	South Asian	10.6364
2898	21	Female	South Asian	15.6128
2777	21	Male	South Asian	26.6548
2816	21	Male	South Asian	13.8793
2828	21	Male	South Asian	9.6123
2871	21	Male	South Asian	22.7015
2874	21	Male	South Asian	16.6528
2875	21	Male	South Asian	32.6797
2881	21	Male	South Asian	34.2661
2796	22	Female	South Asian	34.9854
2827	22	Female	South Asian	9.6123
2843	22	Male	South Asian	40
1599	32	Female	South Asian	32.6797
2860	18	Female	Other (ineligible admixed)	17.8412
2876	18	Female	Other (ineligible admixed)	36.3636
2880	18	Female	Other (ineligible admixed)	29.383
2772	20	Male	Other (ineligible admixed)	30.6592
2856	20	Male	Other (ineligible admixed)	7.69231
2879	20	Male	Other (ineligible admixed)	17.8412
2942	21	Female	Other (ineligible admixed)	17.8412
2945	21	Female	Other (ineligible admixed)	36.3636
2812	21	Male	Other (ineligible admixed)	6.94364

## Sheet: Olfactory Genotypes
ID	Ancestry	rs6265	rs17712299	rs17132289	rs2889732	rs13036385	rs6746030
1158	2	C:C	T:T	A:A	C:A	G:C	G:G
1599	3	T:T	T:T	A:A	A:A	C:C	G:G
2703	2	C:C	T:T	T:A	A:A	G:C	G:G
2769	3	C:C	T:T	A:A	A:A	C:C	G:A
2770	1	T:C	T:C	T:A	C:C	G:G	G:G
2771	2	C:C	T:T	A:A	A:A	G:C	G:A
2773	1	T:C	T:T	A:A	C:A	G:G	G:G
2774	2	T:C	T:C	A:A	C:A	G:G	G:A
2775	3	C:C	T:T	A:A	C:A	G:G	G:G
2776	3	T:T	T:T	A:A	C:C	G:G	G:G
2777	3	C:C	T:T	A:A	C:A	G:C	G:A
2778	1	T:C	T:T	A:A	C:A	G:G	G:A
2779	2	C:C	T:T	T:A	A:A	C:C	G:G
2780	3	C:C	T:T	A:A	A:A	G:C	G:G
2781	1	T:C	T:T	A:A	C:A	G:C	G:G
2782	2	C:C	T:T	A:A	A:A	G:G	G:G
2789	1	T:C	T:C	A:A	C:A	G:C	G:G
2790	1	C:C	T:C	A:A	C:C	G:G	G:G
2791	1	T:C	C:C	T:T	C:C	G:G	G:G
2792	2	C:C	T:T	T:A	C:A	G:C	G:G
2793	2	?	T:T	A:A	C:A	G:G	?
2794	1	T:T	T:T	A:A	C:C	G:G	G:G
2795	2	C:C	T:T	A:A	C:A	G:G	G:G
2796	3	T:C	T:T	A:A	C:A	G:C	G:G
2797	3	C:C	T:T	A:A	C:A	G:G	G:A
2798	3	T:C	T:T	A:A	C:A	G:C	G:G
2799	1	T:C	T:T	A:A	C:C	G:G	G:G
2800	2	T:C	T:C	A:A	A:A	G:G	G:G
2801	1	T:C	T:T	A:A	A:A	G:C	G:G
2802	3	T:C	T:T	A:A	C:C	G:G	G:G
2803	1	T:T	T:T	A:A	C:C	G:G	G:G
2804	3	C:C	T:T	A:A	A:A	G:C	G:A
2806	3	C:C	T:C	A:A	A:A	G:G	G:A
2807	1	C:C	T:T	A:A	C:C	G:G	G:G
2808	2	T:C	T:T	A:A	C:A	G:C	G:A
2809	2	C:C	T:T	A:A	A:A	C:C	G:G
2810	1	T:C	T:T	A:A	C:A	G:C	G:G
2811	2	C:C	T:T	A:A	C:A	G:C	G:G
2813	2	C:C	T:T	A:A	C:A	G:G	G:A
2814	3	C:C	T:T	A:A	A:A	G:C	G:G
2815	3	C:C	T:T	A:A	C:C	G:G	G:G
2817	2	C:C	T:T	A:A	C:A	G:G	G:G
2818	2	C:C	T:T	A:A	C:C	G:G	G:G
2819	2	C:C	T:T	A:A	A:A	G:C	G:G
2820	2	T:C	T:T	A:A	C:A	G:C	G:A
2821	1	C:C	T:T	A:A	C:C	G:G	G:G
2822	3	T:T	T:T	A:A	A:A	G:C	G:G
2823	3	C:C	T:T	A:A	C:A	G:C	G:G
2824	2	C:C	T:T	A:A	C:A	G:C	G:G
2825	3	T:C	T:T	A:A	A:A	G:G	G:G
2826	2	C:C	T:T	A:A	C:C	G:G	G:G
2827	3	C:C	T:T	A:A	C:C	G:G	G:G
2828	3	C:C	T:T	A:A	C:A	G:C	G:G
2829	3	T:C	T:C	A:A	A:A	G:C	G:G
2830	2	C:C	T:T	A:A	C:C	G:G	G:G
2831	3	C:C	T:T	A:A	C:C	G:G	G:G
2832	2	C:C	T:T	A:A	C:C	G:G	G:G
2833	2	C:C	T:T	A:A	C:A	G:G	G:G
2834	2	T:C	T:T	A:A	A:A	G:C	G:G
2836	3	T:C	T:T	A:A	C:A	G:G	G:A
2837	3	C:C	T:T	A:A	C:A	G:C	G:A
2838	2	C:C	T:T	A:A	C:C	G:G	G:G
2839	2	C:C	T:C	A:A	C:A	G:G	G:G
2840	3	C:C	T:T	A:A	A:A	G:C	G:G
2841	1	C:C	T:C	?	C:C	G:G	G:G
2842	2	C:C	T:T	A:A	C:A	G:C	G:G
2843	3	C:C	T:C	A:A	C:A	G:G	G:G
2844	2	C:C	T:T	A:A	A:A	G:C	G:A
2845	2	T:C	T:T	A:A	C:A	G:C	G:G
2846	2	C:C	T:T	A:A	C:A	G:G	G:G
2847	2	C:C	T:T	A:A	C:A	G:G	G:G
2848	2	C:C	T:T	T:A	A:A	G:C	G:G
2849	3	C:C	T:T	A:A	C:A	G:G	G:G
2850	1	T:C	T:T	T:A	C:A	G:C	G:G
2851	3	T:C	T:T	A:A	A:A	C:C	G:G
2852	1	C:C	T:T	A:A	C:C	G:G	G:G
2853	1	T:C	T:C	A:A	C:C	G:G	G:G
2854	2	T:T	T:T	T:A	C:A	G:C	G:A
2855	2	C:C	T:T	A:A	A:A	G:G	G:G
2857	3	C:C	T:T	A:A	C:C	G:G	G:G
2858	2	C:C	T:T	T:A	?	?	G:G
2859	2	C:C	T:T	A:A	C:A	G:G	G:G
2861	2	C:C	T:T	A:A	C:A	G:C	G:G
2862	2	T:C	T:T	A:A	C:A	G:C	G:G
2863	1	T:T	T:T	T:A	C:C	G:G	G:G
2865	3	T:C	T:T	A:A	C:C	G:G	G:A
2866	1	T:C	T:T	T:A	C:C	G:G	G:G
2867	3	T:T	T:C	A:A	A:A	G:C	G:G
2868	1	C:C	T:T	A:A	C:A	G:C	G:G
2870	2	C:C	T:T	A:A	A:A	C:C	G:A
2871	3	C:C	T:T	A:A	C:C	G:G	G:A
2872	2	C:C	T:T	A:A	C:C	G:G	G:A
2873	3	C:C	T:T	A:A	A:A	C:C	G:A
2874	3	C:C	T:T	A:A	C:A	G:C	G:A
2875	3	C:C	T:T	A:A	C:C	G:G	G:G
2877	2	C:C	T:T	A:A	C:A	G:G	G:G
2878	2	C:C	T:T	A:A	A:A	G:G	G:G
2881	3	C:C	T:C	A:A	C:C	G:G	G:A
2882	2	T:C	T:T	A:A	C:A	G:C	G:G
2883	2	T:C	T:T	A:A	C:A	G:C	G:A
2884	2	C:C	T:T	A:A	C:A	G:G	G:G
2885	3	C:C	T:T	A:A	C:A	G:G	G:G
2886	2	T:C	T:T	A:A	C:A	G:G	G:G
2887	3	T:T	T:T	A:A	A:A	C:C	G:G
2888	3	C:C	T:C	A:A	C:A	G:C	G:G
2889	3	C:C	T:T	A:A	A:A	G:C	G:G
2890	1	T:T	T:T	A:A	C:C	G:G	G:G
2891	3	T:C	T:T	A:A	C:A	G:G	G:A
2892	1	C:C	T:T	A:A	C:A	G:C	G:A
2893	3	T:C	T:C	A:A	C:A	G:C	G:G
2894	1	T:T	T:T	A:A	C:C	G:G	G:G
2895	2	C:C	T:T	A:A	C:A	G:C	G:G
2896	2	T:C	T:T	A:A	C:A	G:G	G:G
2898	3	T:C	T:T	A:A	C:A	G:G	G:G
2899	2	C:C	T:T	T:A	A:A	G:C	G:G
2900	3	T:C	T:T	A:A	C:C	G:G	G:G
2901	3	C:C	T:T	A:A	C:C	G:G	G:G
2902	1	T:C	T:T	A:A	C:C	G:G	G:A
2903	2	T:C	T:C	A:A	C:A	G:G	G:G
2904	1	C:C	T:T	A:A	C:A	G:C	G:A
2905	3	T:C	T:T	A:A	A:A	G:C	G:G
2906	3	C:C	T:T	A:A	C:A	G:C	G:G
2908	1	T:T	T:T	A:A	A:A	C:C	G:G
2909	1	C:C	T:T	A:A	C:C	G:G	G:G
2910	1	C:C	T:T	A:A	C:A	G:G	G:G
2911	3	T:C	T:C	A:A	C:C	G:G	G:G
2913	2	C:C	T:T	A:A	A:A	G:C	G:G
2914	3	C:C	T:T	A:A	A:A	G:C	G:G
2915	3	T:C	T:T	A:A	C:C	G:G	G:A
2916	1	T:T	T:T	A:A	C:C	G:G	G:G
2917	1	T:C	T:C	A:A	C:A	G:G	G:G
2918	3	C:C	T:T	A:A	C:A	G:G	G:A
2919	2	?	T:T	A:A	A:A	G:G	G:G
2920	1	T:C	T:T	T:A	C:C	G:G	G:G
2921	2	C:C	T:T	A:A	C:A	G:C	G:A
2922	3	C:C	T:C	A:A	C:A	G:G	G:G
2923	3	T:C	T:T	A:A	C:A	G:C	G:G
2924	2	C:C	T:C	A:A	A:A	G:C	G:A
2925	1	T:T	T:C	A:A	C:C	G:G	G:G
2926	1	C:C	T:T	A:A	C:A	G:G	G:G
2927	1	C:C	T:C	A:A	C:C	G:G	G:G
2928	1	T:C	T:T	A:A	C:C	G:G	G:G
2929	1	T:T	T:C	A:A	C:C	G:G	G:G
2930	3	C:C	T:T	A:A	A:A	G:C	G:G
2931	3	T:C	T:T	A:A	C:A	G:C	G:G
2932	1	T:T	T:C	A:A	C:C	G:G	G:G
2933	1	T:C	T:T	A:A	C:C	G:G	G:G
2934	1	T:C	T:T	A:A	C:A	G:G	G:G
2935	1	C:C	T:C	A:A	C:A	G:C	G:G
2936	1	T:C	T:T	A:A	C:A	G:G	G:G
2937	1	T:C	T:T	A:A	C:A	G:C	G:G
2938	1	T:T	T:T	T:A	C:C	G:G	G:G
2939	3	C:C	T:T	A:A	C:A	G:G	G:G
2940	1	T:C	T:T	A:A	C:A	G:G	G:G
2941	1	C:C	T:T	A:A	C:C	G:G	G:G
2943	1	T:T	T:T	A:A	C:C	G:G	G:A
2944	1	T:C	T:T	A:A	C:A	G:C	G:G
2946	1	T:T	T:C	T:A	C:A	G:C	G:G
2947	1	T:C	T:C	T:A	C:A	G:G	G:G
2948	1	T:C	T:T	A:A	C:C	G:G	G:G
2949	3	T:C	T:T	A:A	C:C	G:G	G:G
2950	1	T:C	T:T	A:A	C:A	G:G	G:G
2951	1	T:C	T:T	A:A	C:C	G:G	G:G
2952	1	T:T	T:T	A:A	C:C	G:G	G:G
2953	1	T:C	T:T	A:A	C:C	G:G	G:G
2954	1	T:C	T:T	A:A	C:A	G:G	G:G
2955	1	T:C	T:C	A:A	C:C	G:G	G:G
2956	1	C:C	T:T	A:A	C:C	G:G	G:G
2957	1	T:T	T:T	A:A	C:C	G:G	G:G

## Sheet: Genotype Frequencies
East Asian
SNP	Y	Het	X	Allele Y%	Allele X%	Allele Y	Allele X
rs6265	134	282	117	51.525	48.475	T	C
rs17712299	357	154	20	81.8717	18.1283	T	C
rs17132289	7	96	429	10.255	89.745	T	A
rs2889732	324	181	30	77.4567	22.5433	C	A
rs13036385	405	114	9	87.5567	12.4433	G	C
rs6746030	478	57	0	94.6467	5.35333	G	A
European
SNP	Y	Het	X	Allele Y%	Allele X%	Allele Y	Allele X
rs6265	18	192	435	18.93	81.07	T	C
rs17712299	577	71	2	94.8862	5.11375	T	C
rs17132289	4	89	559	6.5775	93.4225	T	A
rs2889732	82	316	252	37.6113	62.3887	C	A
rs13036385	364	243	41	75.35	24.65	G	C
rs6746030	479	157	11	86.105	13.895	G	A
South Asian
SNP	Y	Het	X	Allele Y%	Allele X%	Allele Y	Allele X
rs6265	23	126	221	23.568	76.432	T	C
rs17712299	340	30	2	95.114	4.886	T	C
rs17132289	0	25	347	2.742	97.258	T	A
rs2889732	80	171	115	47.216	52.784	C	A
rs13036385	198	137	32	74.19	25.81	G	C
rs6746030	256	108	6	84.466	15.534	G	A
